# Supplementary material
Source: HighWire-hosted journal article supplement (https://informatics.bmj.com/content/26/1/e000017)
Supplement: inline-supplementary-material-1 [file inline-supplementary-material-1.xlsx]

## Sheet: Sheet1
Name	Developer	Version	Latest update	Rating	Size
Beat Diabetes	Let Me Hear Again Apps	3.6	2017-04-16	4.5	4.67 MB
Diabetes Journal	Suderman Solution	1.7.2	2017-06-04	4.5	3.58 MB
Diabetes Fitness	Ankit Chauhan	1.4	2017-04-18	4.5	5.88 MB
Diabetes	Best Free Hot Android Apps	1	2016-04-09	4.5	1.72 MB
BeatO Diabetes Management	BeatO	1.3.8	2017-05-27	4.6	8.71 MB
Familiprix-My Diabetes	Familiprix inc	1.3.2.761	2017-04-15	4.7	83.28 MB
Beat Diabetes LTMMC, Mumbai	TIMSCDR	1.6	2017-05-24	4.8	2.83 MB
Diabetes Blog	Diab.in	3	2017-04-11	4.7	10.11MB
kNOw Diabetes	knowDiabetes	1.1	2017-06-29	5	2.66MB
Diabetes Destroyer	H&S Apps	1.1	2017-05-07	5	10.23 MB
Diabetes Managemnet	ZinMed.com	1.4.5	2016-09-13	4.7	16.04 MB
Diabetes-Diabetes Diet Tips	FinalApps	0.0.1	2016-10-31	5	3.46 MB
diabetes Help	Dusko Savic	2	2016-04-17	5	1.51MB
Diabetes Information	Hydroid	1.0.0	2016-02-27	5	2.93 MB
Diabetes Prevent	Patia	1.2.6	2016-04-27	5	29.48MB
Diabetic Recipes	Tech Monster Studio Lab	2.0.0	2016-05-18	5	4.56 MB
Live Better Life with Diabetes	K SOW JANYA	1	2015-06-10	5	2.3MB
RVC Pet Diabetes App	The Royal Veterinary College	1.6	2016-04-14	4.8	7.97MB
Diabetes and Prtection	Amit777	1	2015-10-30	5	2.16MB
Diabetiko-Diabetes Care App	Siabetiko	1.0.1	2015-09-20	5	2.86MB
Defeat Diabetes	Cheri Apps	1	2016-05-18	5	4.84MB
Diabetes Destroyer Review	Gayathri S K	1	2015-07-28	5	2.23MB
Diabetes Cures	MosaicMediaGroup	2	2015-09-29	5	7.17MB
Diabetes Nerve Pain	Revolxa Inc	1	2015-04-10	5	5.95MB
DiaLog: Diabetes Logbook Demo	David Froehlich	1.3.18	2016-02-04	4.5	1.53MB
Managelt- Diabetes Assistant	Meeho	2	2015-12-16	5	10.21MB
Diabetes Tube	TM-Soft Studio	0.1	2015-07-04	5	1.21MB
Diabetes Treatment Manual	Zinmed.com	1.0.2	2015-07-11	5	9.88MB
Diabetic Food Recipes:Free!	Core.Apps	1.4.1	2015-12-31	4.5	3.75MB
Diabetes Checker	Sachin Kumar Awasthi	1.5	2015-09-17	4.6	3.25MB
MHC Diabetes	Micro Medical Health Care	1.1	2015-04-03	5	1.1MB
Diabetes (Symptom & Solution)	Droid Studio India	1.4	2015-10-16	5	2.15MB
Fight Diabetes	BSF	1	2016-04-15	5	1.29 MB
Deazy-Diabetes & Weight App	Onemed Crew Pvt Ltd	2.0.141.160603	2016-06-03	4.5	13.91 MB
Diabetes Information	One-Heart	8.9	2016-03-18	4.7	4.47 MB
How to Control Diabetes	SandStone Solution	1	2015-08-16	5	2.55 MB
Diacomp(Diabetes Diary)	Nikita Bosik	2.7.1	2016-01-05	4.6	538 KB
Hayati-Diabetes Guide	Dubai Health Authority	1.3	2016-06-05	5	16.82MB
EasyMax Diabetes Care	Appsme41	3.1	2016-02-29	5	12.18MB
Patiententagebuch-Diabetes	M&A co	0.01	2016-03-29	5	4.84 MB
CAMTech Diabetes Hackathon	Lattice Innovations	1.1	2015-10-08	4.7	7.31 MB
Coping With Diabetes	MosaicMediaGroup	2	2015-09-29	5	7.17 MB
Diabetes Recipes:healthy food	Fitness Circle	11.0.0	2016-05-30	4.1	5.36
Diabetes Menu	Abbott	1.1.0	2016-04-01	4.2	17.48
Diabetes Weight Less	All I have Is Video Games Studio	2	2015-10-31	4.2	2.89
Freedom from Diabetes	Periwinkle Technologies	0.1.10.8	2015-09-10	4.3	4.04
Dr Mohans	Jana Care	1.7.11	2016-06-08	4.4	14.16
What is Diabetes?	Dr Hani Naeim	1.2	2015-11-04	4	678 KB
VOBOSE	Passi HealthCom	1.2.2	2016-01-22	4
Dokter Diabetes	PT Amerta Indah Ostuka	3.0.3	2017-06-01	4.3	10.48 MB
Diabetes
Win with Diabetes	Jana Care	1.6.28	2016-12-09	4	14.26 MB
Diabetes Solution Center	PT.Sanghiang Perkasas	1.3.3	2016-09-27	4.3
Diabetes Zentrum	Intercontact	1	2016-07-28	4.2	2.25 MB
Ruby Test	Asia Diabetes Foundation	1.2.8	2017-03-10	4.3	8.87 MB
Diabetes & LCHF	Andy Ng	1.2	2017-05-05	5	1.91 MB
Optimizador Control Diabetes	Jfcorp	1.1.1	2016-08-01	4.9	1.23 MB
Cardio Diabetes Clinic	Citizenone Solution	1	2017-05-06	4.8	0.97 MB
Finger Blood Sugar test prank	ezitools	1.1	2016-10-03	4.1
Dr Diabetes	Omelette-Design	2.2	2017-05-22	4.9	2.54 MB
Defeat Diabetes plus	Cheri Apps	1	2017-05-18	4.3	7.42 MB
Solution to Diabetes	Anita Bose	1	2017-01-13	4	2.55 MB
Diabetes Care Diet	Data Recovery Software	2.3.4	2017-05-14	5	3.58 MB
Super doc	Online doctor appointment	3.2.12	2017-06-06	4.5	11.49 MB
Diabetes & Me	Walsall Healthcare NHS Trust	1	2016-11-03	5	5.99 MB
Glucometer diabetes-prank	bktoor	0.06	2017-06-18	4
Diaguard	philipp Fahlteich	1.4.1	2017-05-06	4.3
MedM Diabetes	MedM Inc	2.0.3	2017-03-17	4.3
Diabeto Diabetes Logbook	Diabeto Inc	1.5	2017-02-05	4.3
Diabetes, Blood Pressure and Wt	Cooey Technologies	2.97	2017-05-10	4.1
Health-PIE Digital Nurse	m Tatva	4.2	2017-03-13	4.3
